# Supplementary material for: An IGF-1R-mTORC1-SRPK2 signaling Axis contributes to FASN regulation in breast cancer
Source: PubMed Central journal article supplement (PMC9469522; doi:10.1186/s12885-022-10062-z), 2022-09-12

Figure 1(A) MCF-7

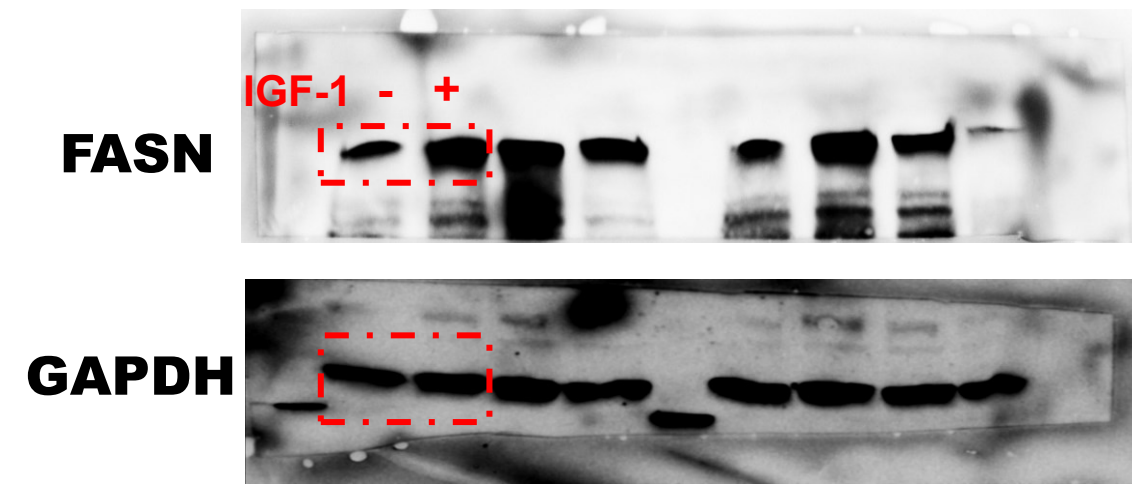

Figure 1(A) MDA-MB-231

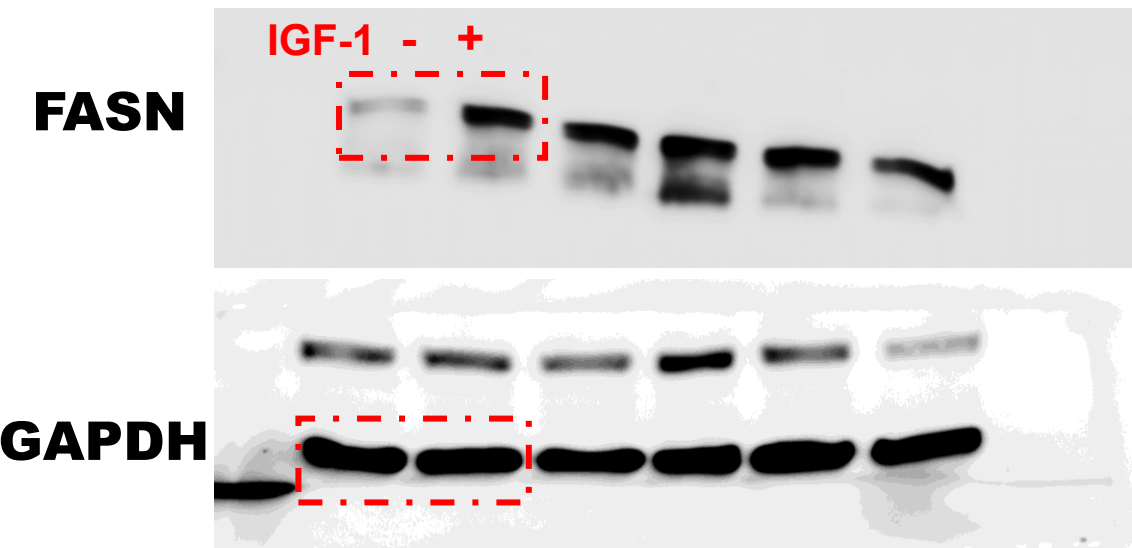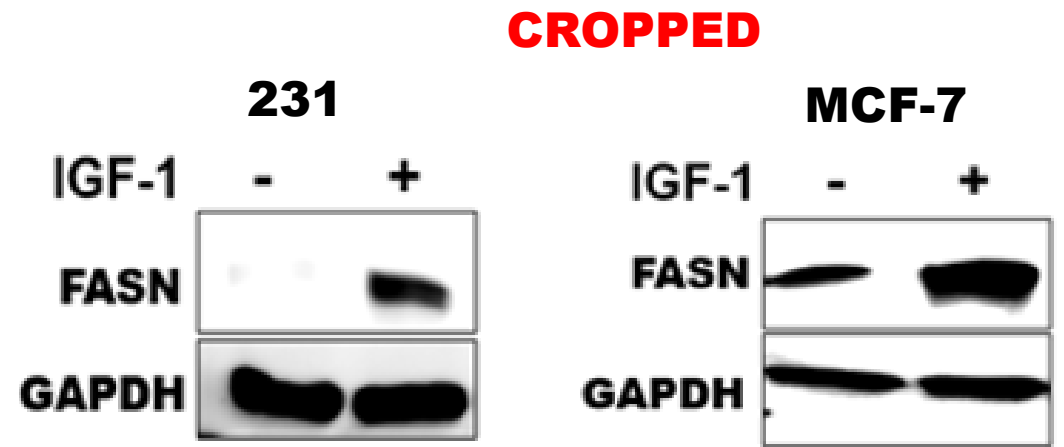

Figure 1(B) MDA-MB-231

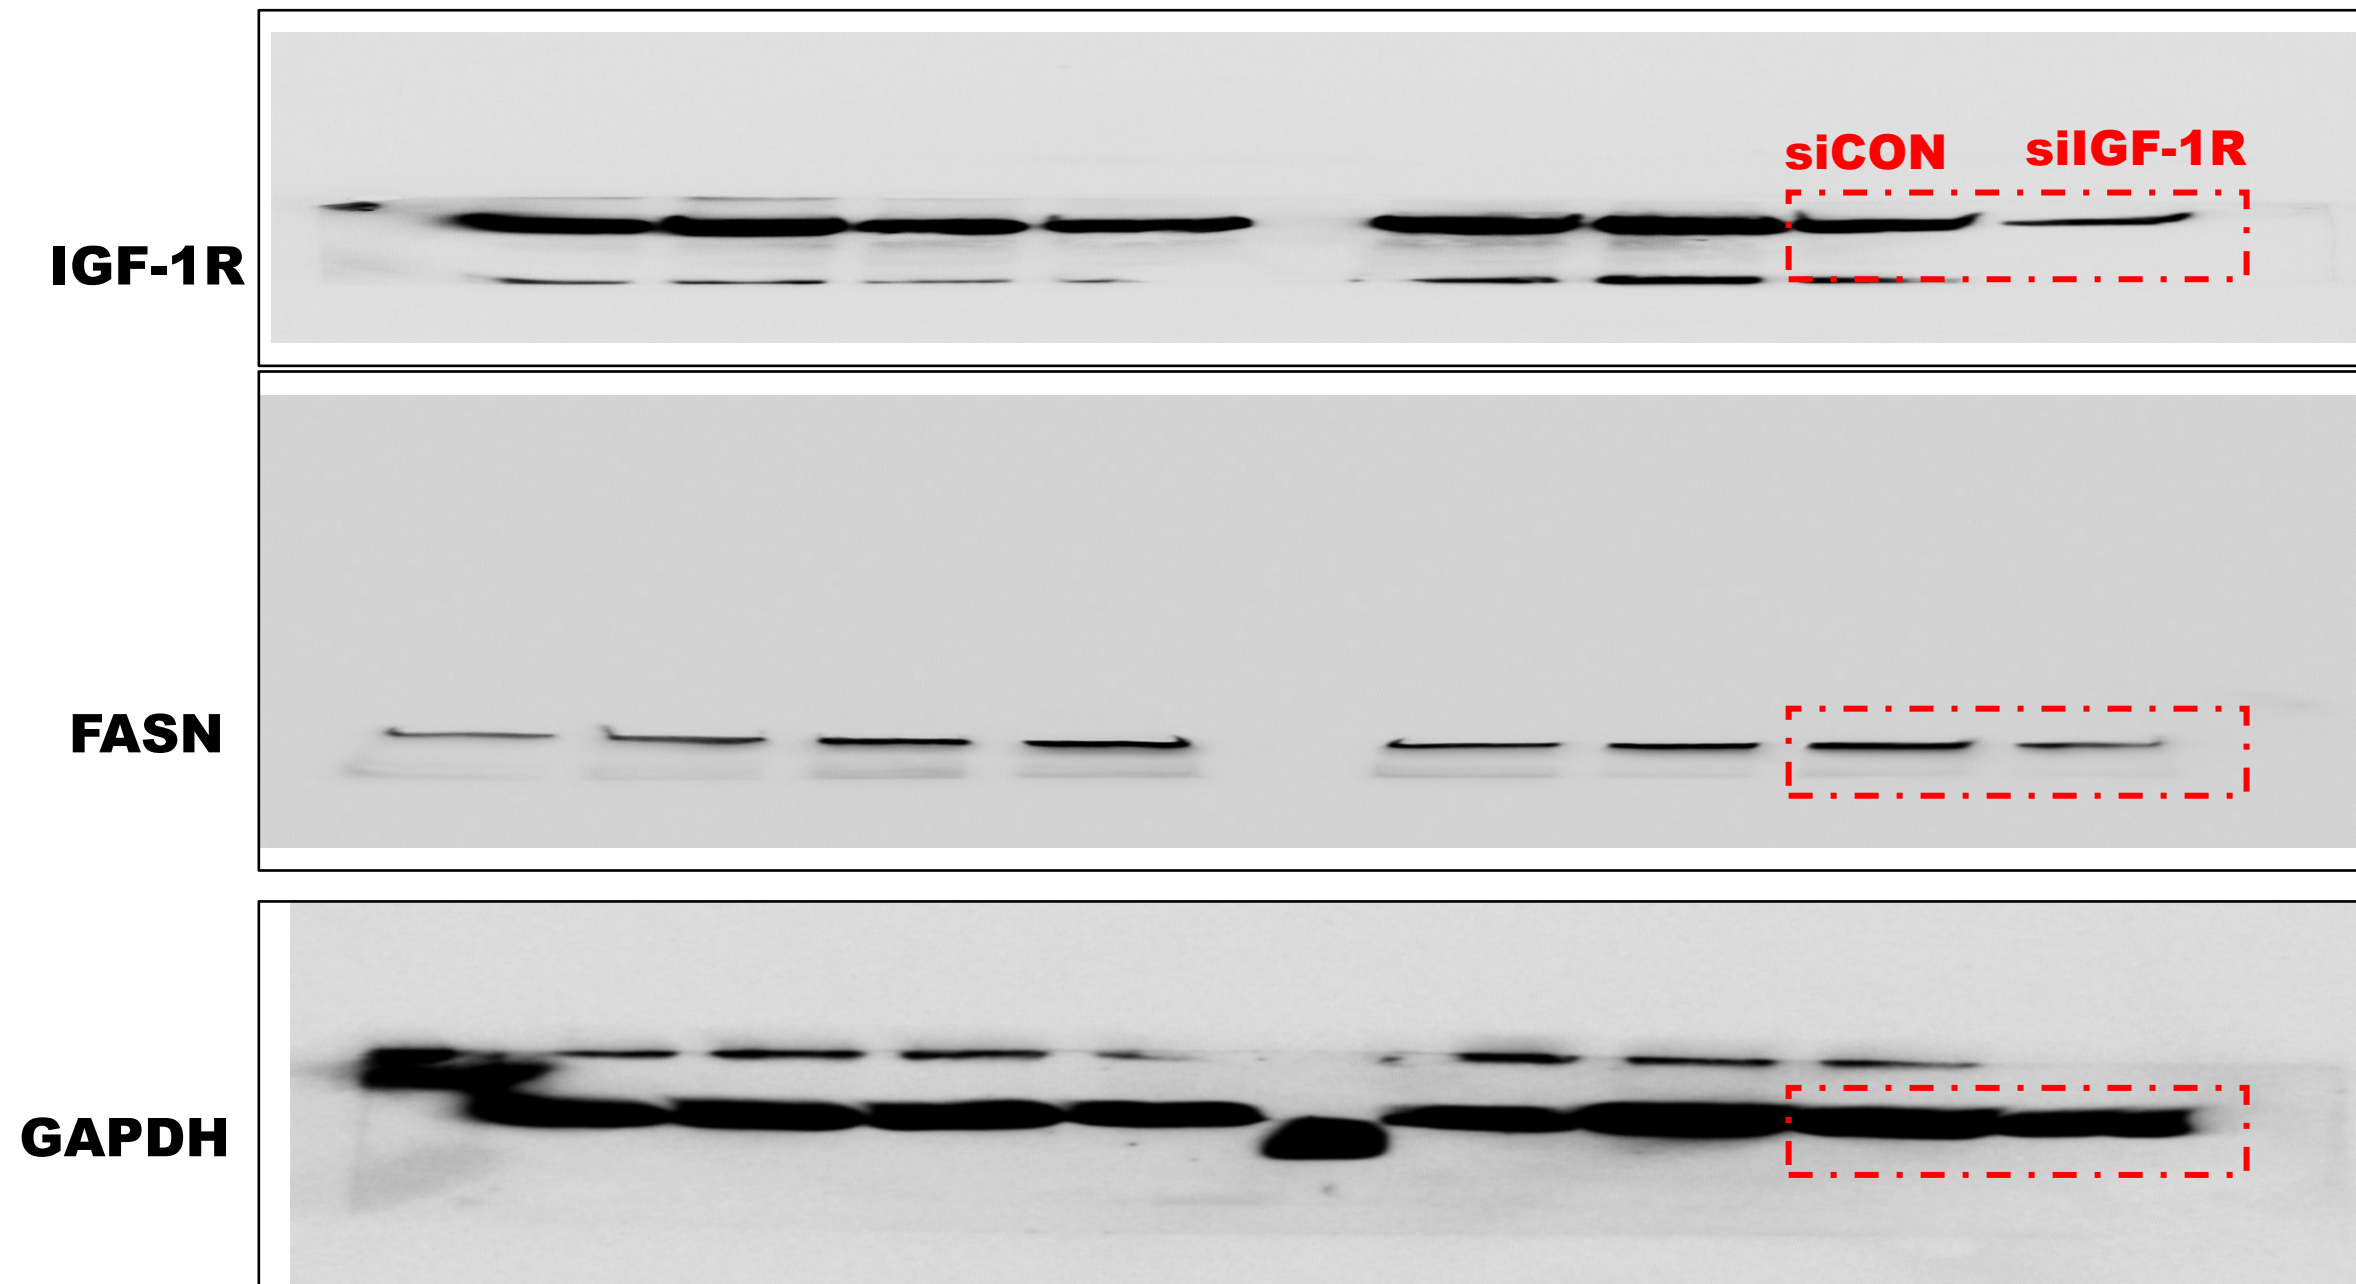

Figure 1(B) MDA-MB-231 (CONTINUED)

LEFT SIDE CUT

**p-Akt**

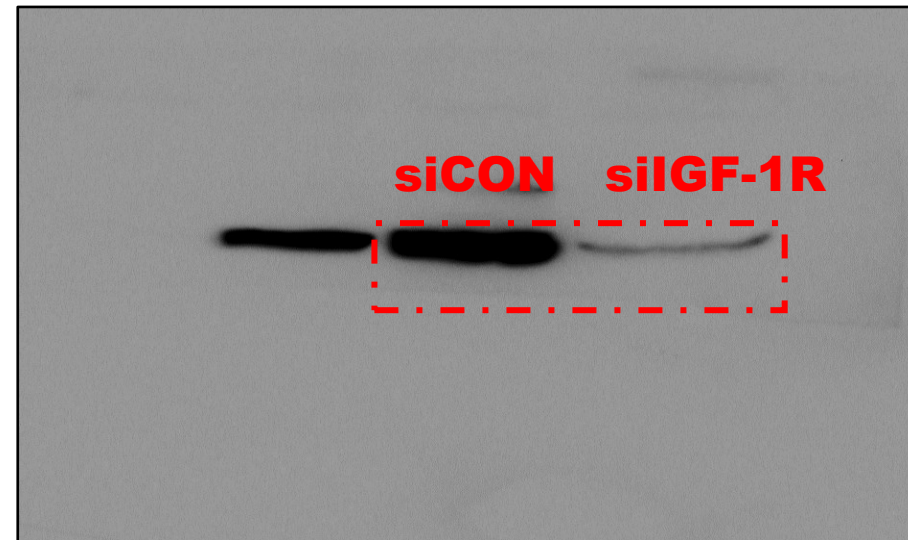

LEFT SIDE CUT

**Akt**

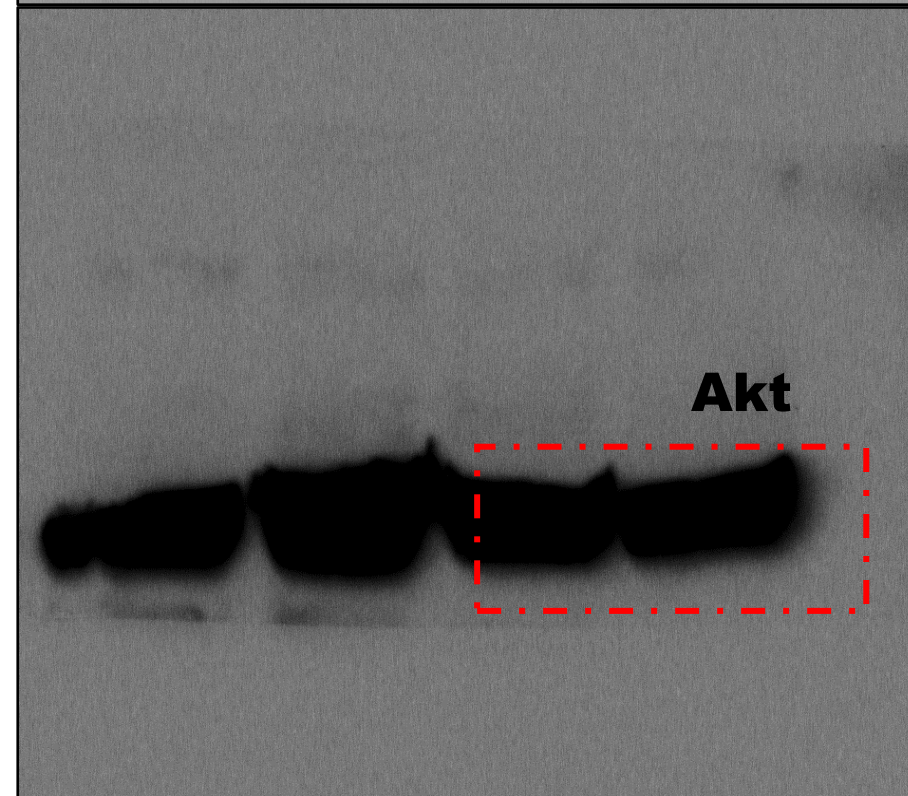

**CROPPED**

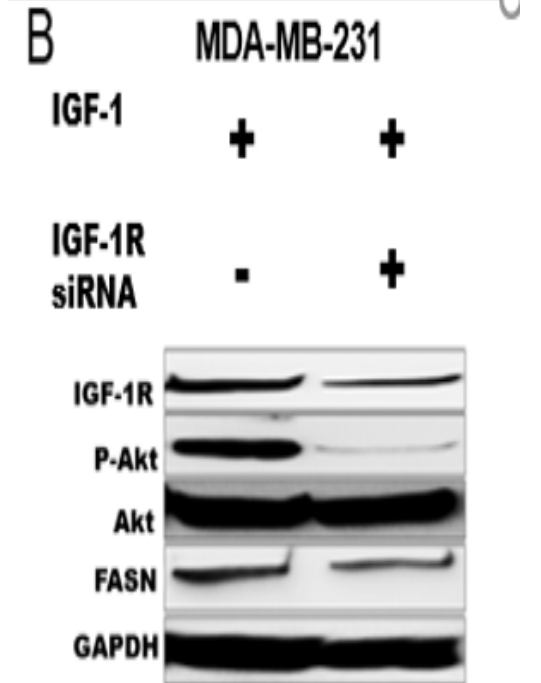

Figure 1(B) MCF-7

**IGF-1R**

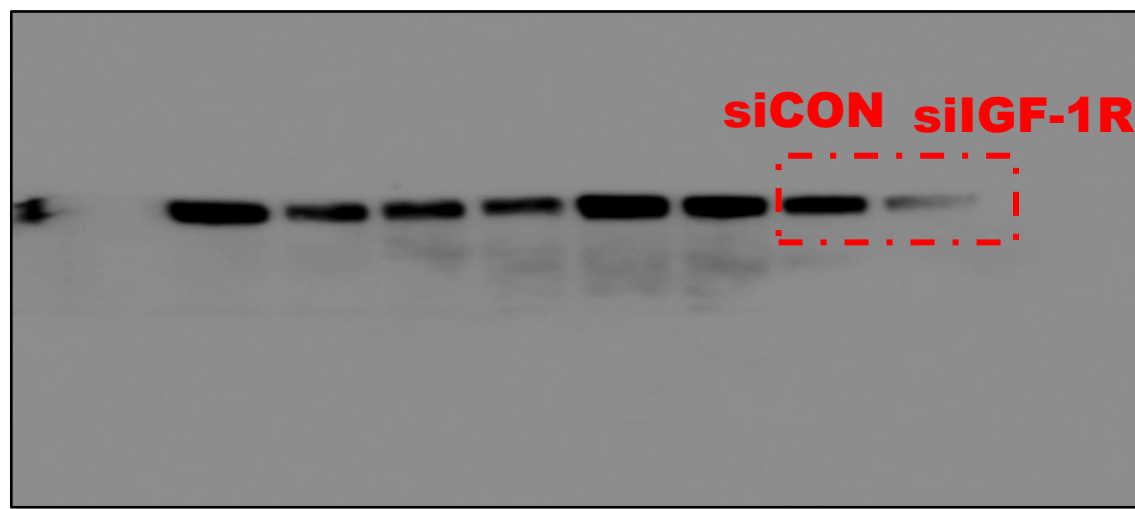

**p-Akt**

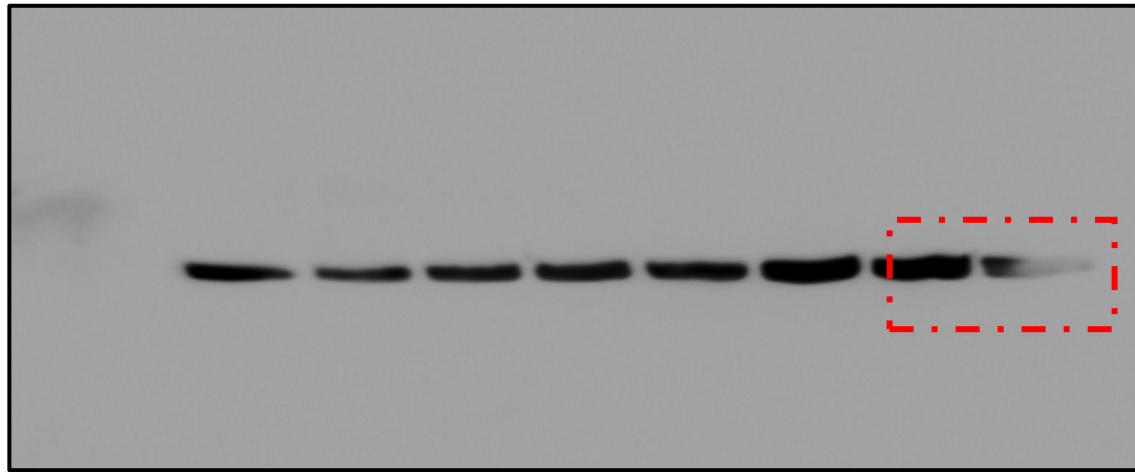

**Akt**

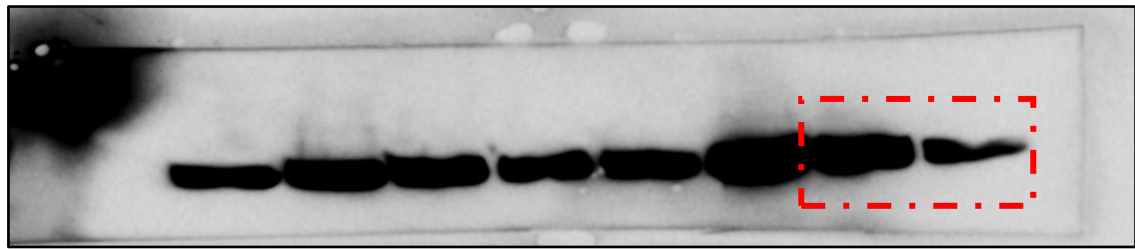

**CROPPED**

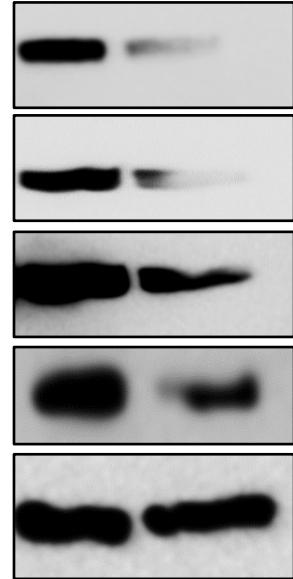

Figure 1(B) MCF-7 (CONTINUED)

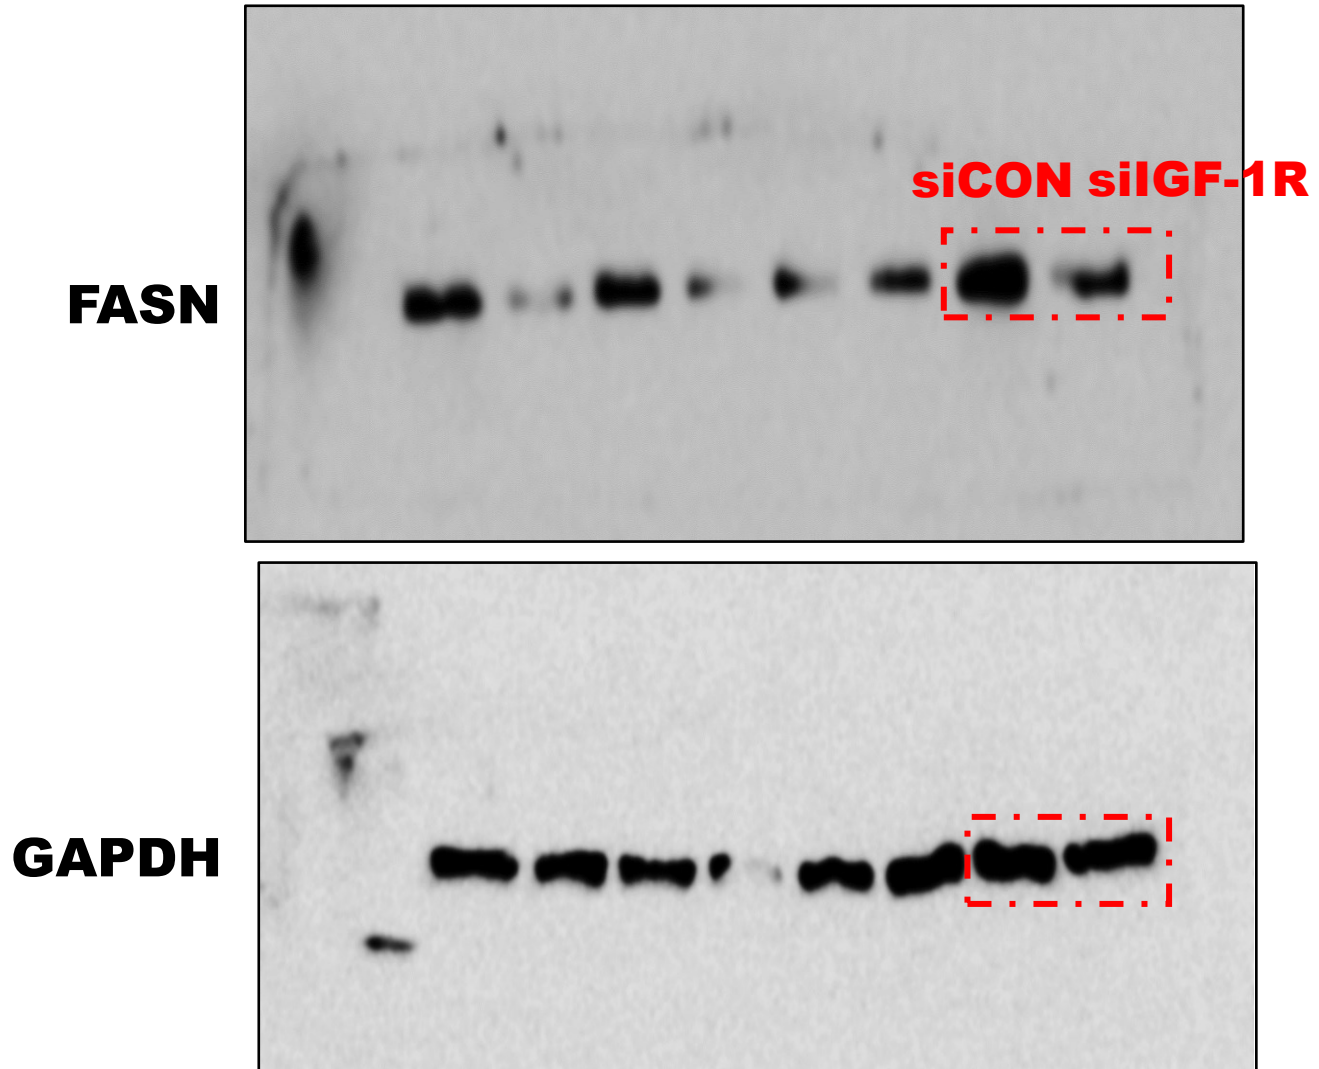

MCF7 REPLICATE 1, 2,&3

FROM FIGURE 1B

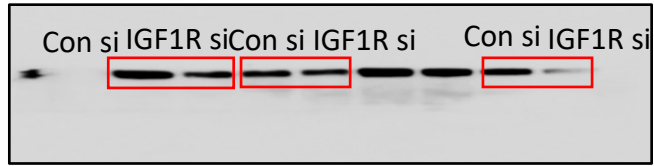

IGF1R

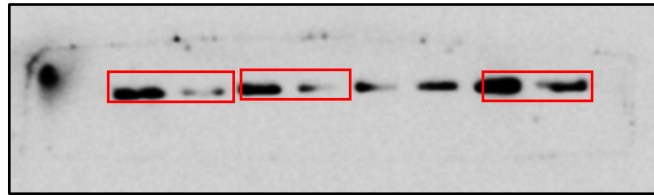

FASN

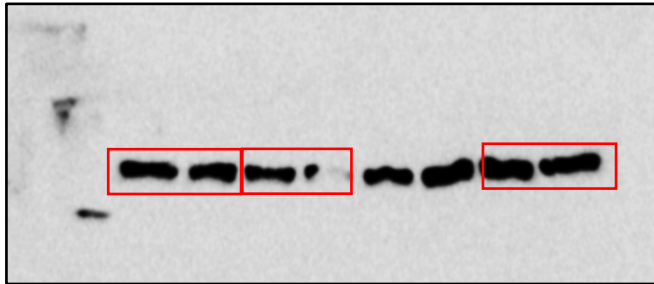

GAPDH

MDA-MB-231 REPLICATE 2&3

FIGURE 1B

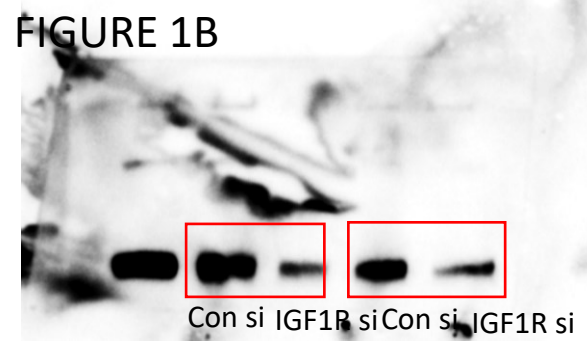

IGF1R

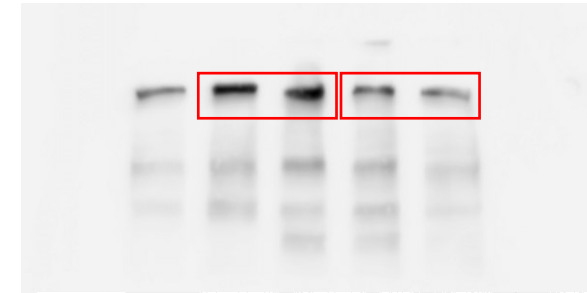

FASN

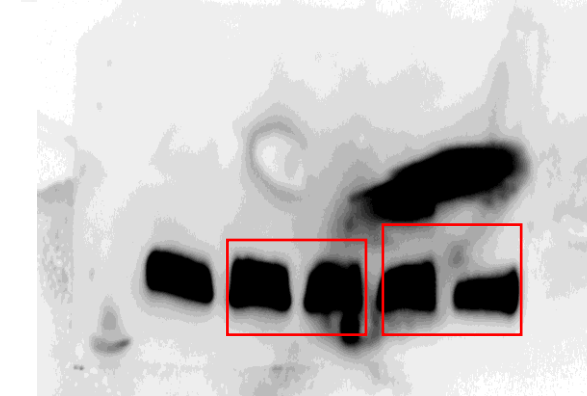

GAPDH

Figure 1(D) MCF-7

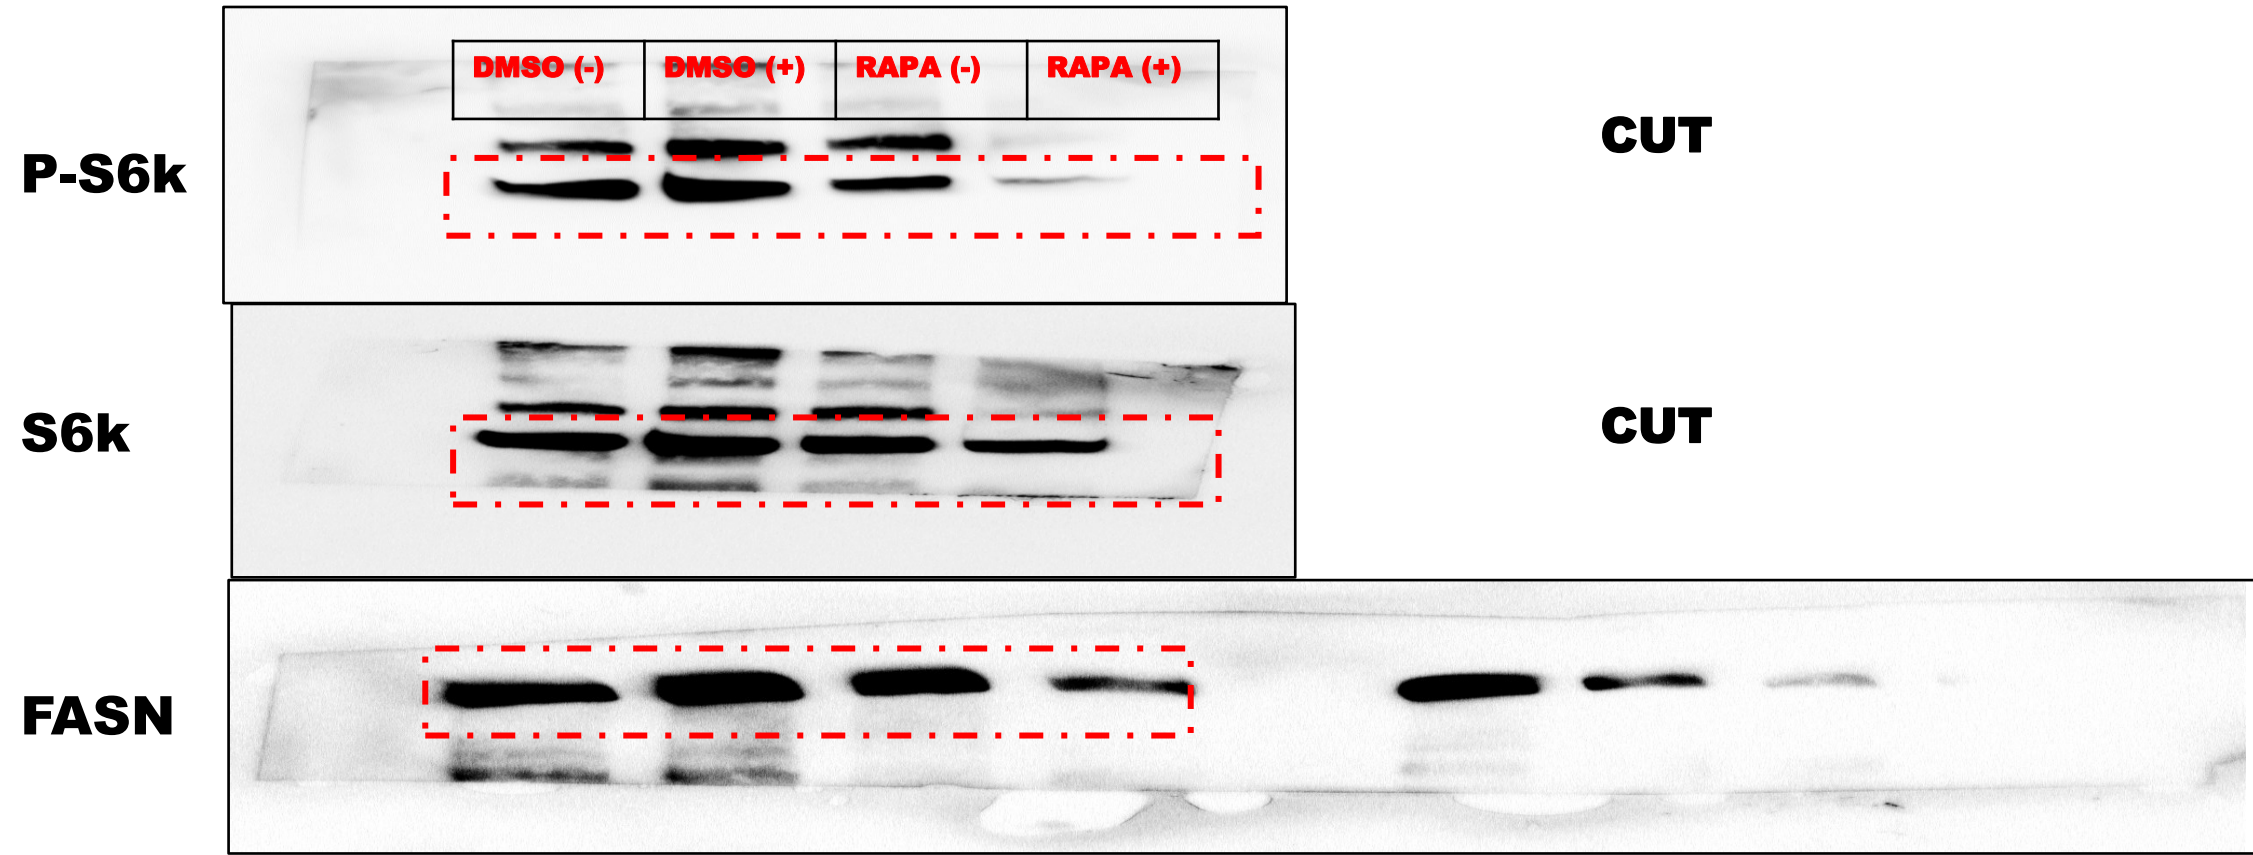

**GAPDH**

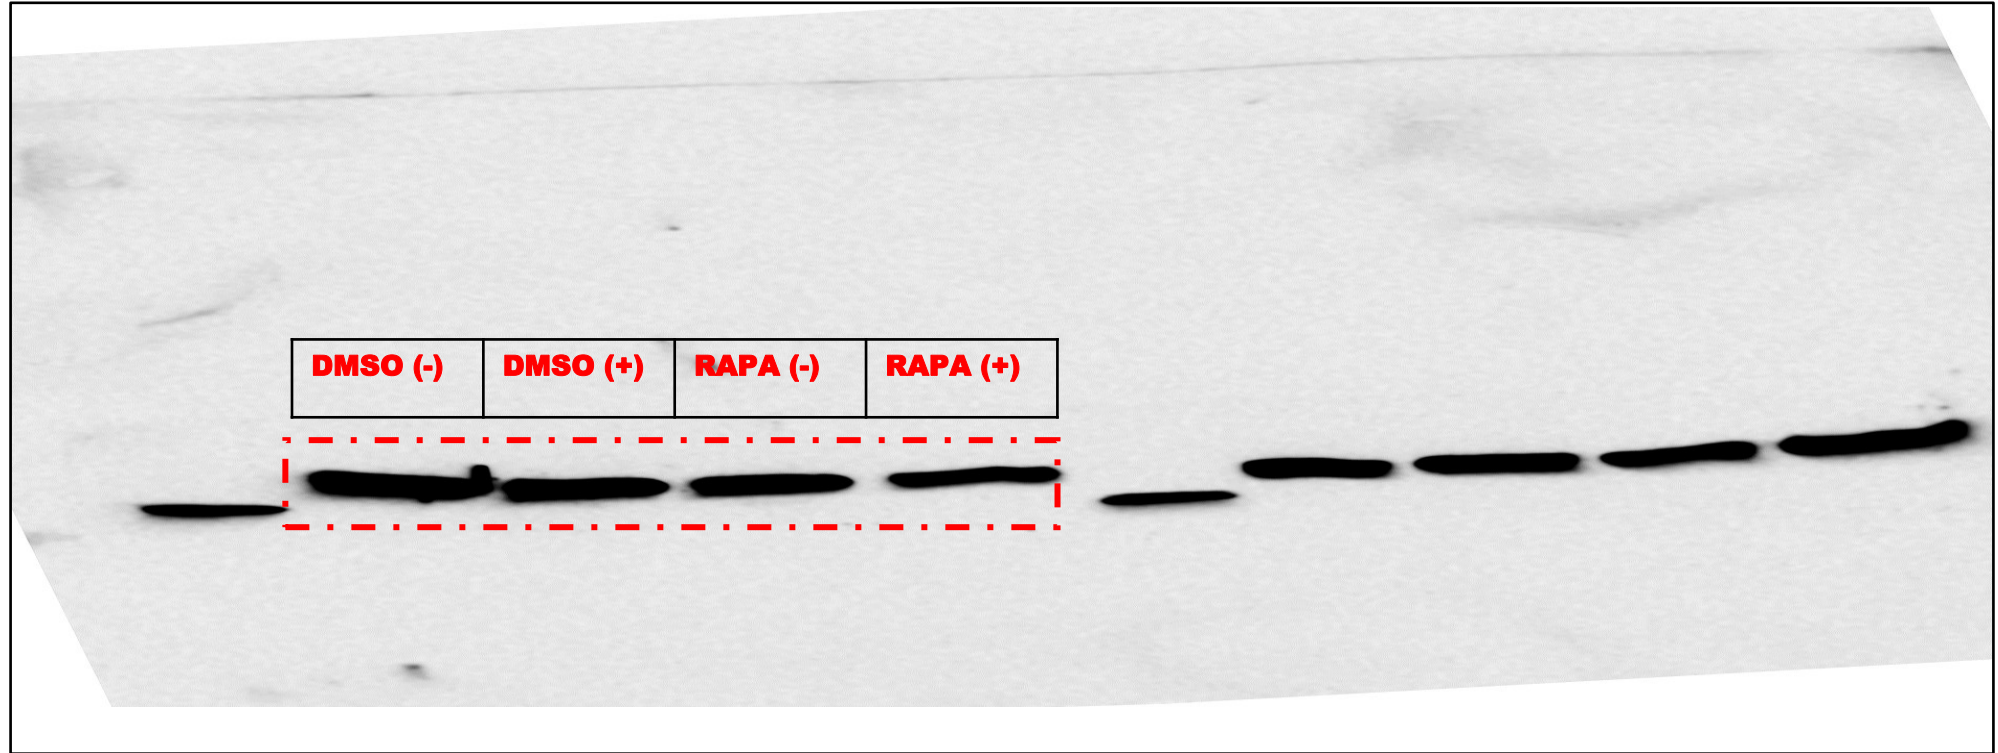

**CROPPED**

**MCF-7**

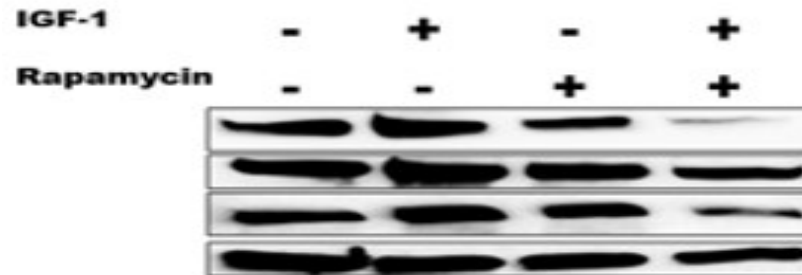



Figure 1(D) MDA-MB-231

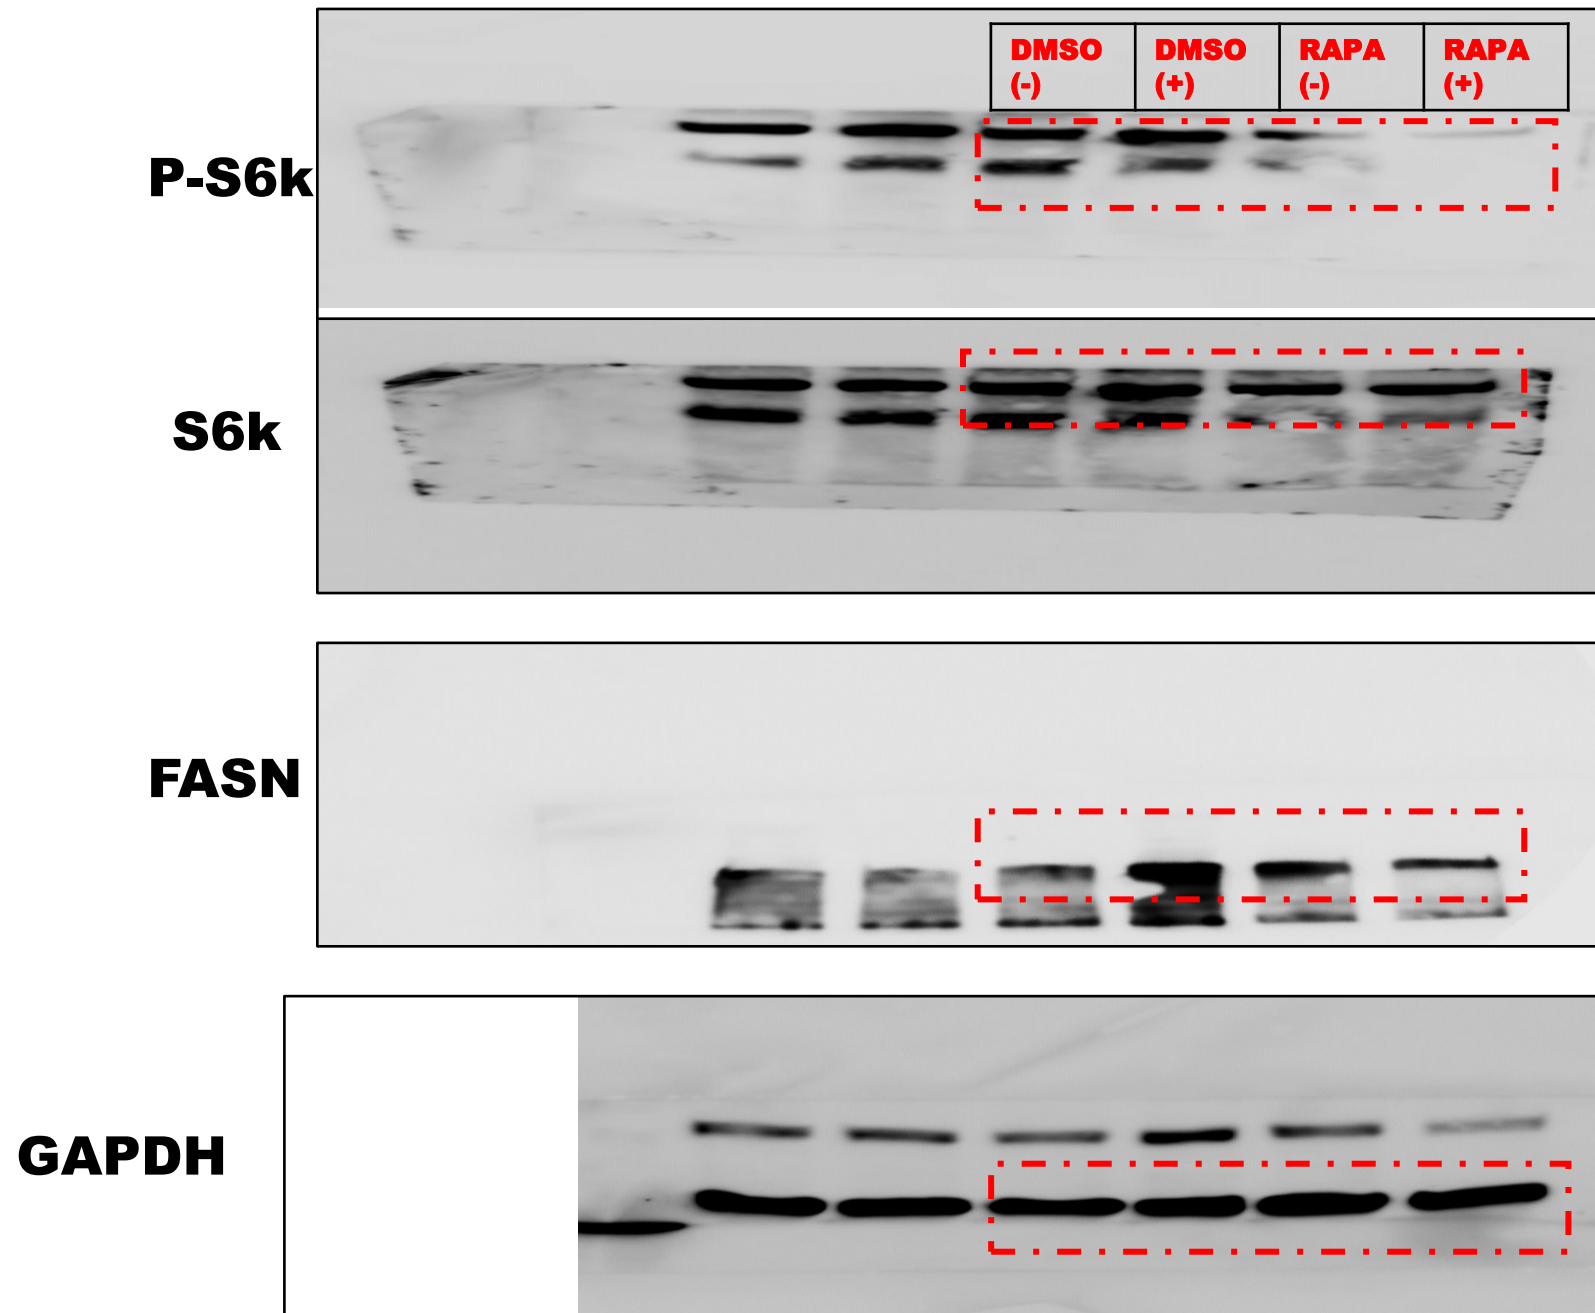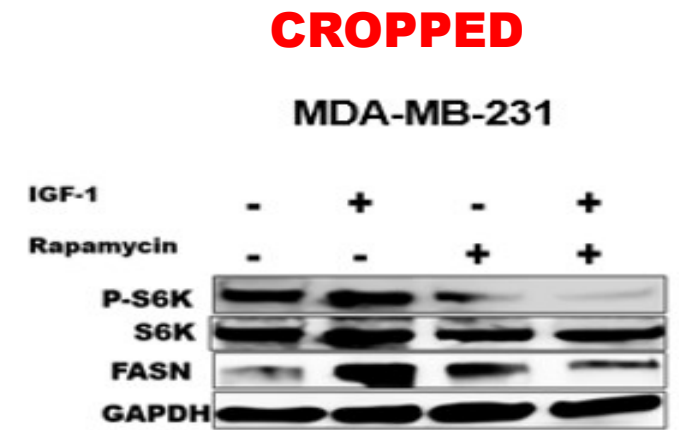

FIGURE 1 D REPLICATE TRIALS

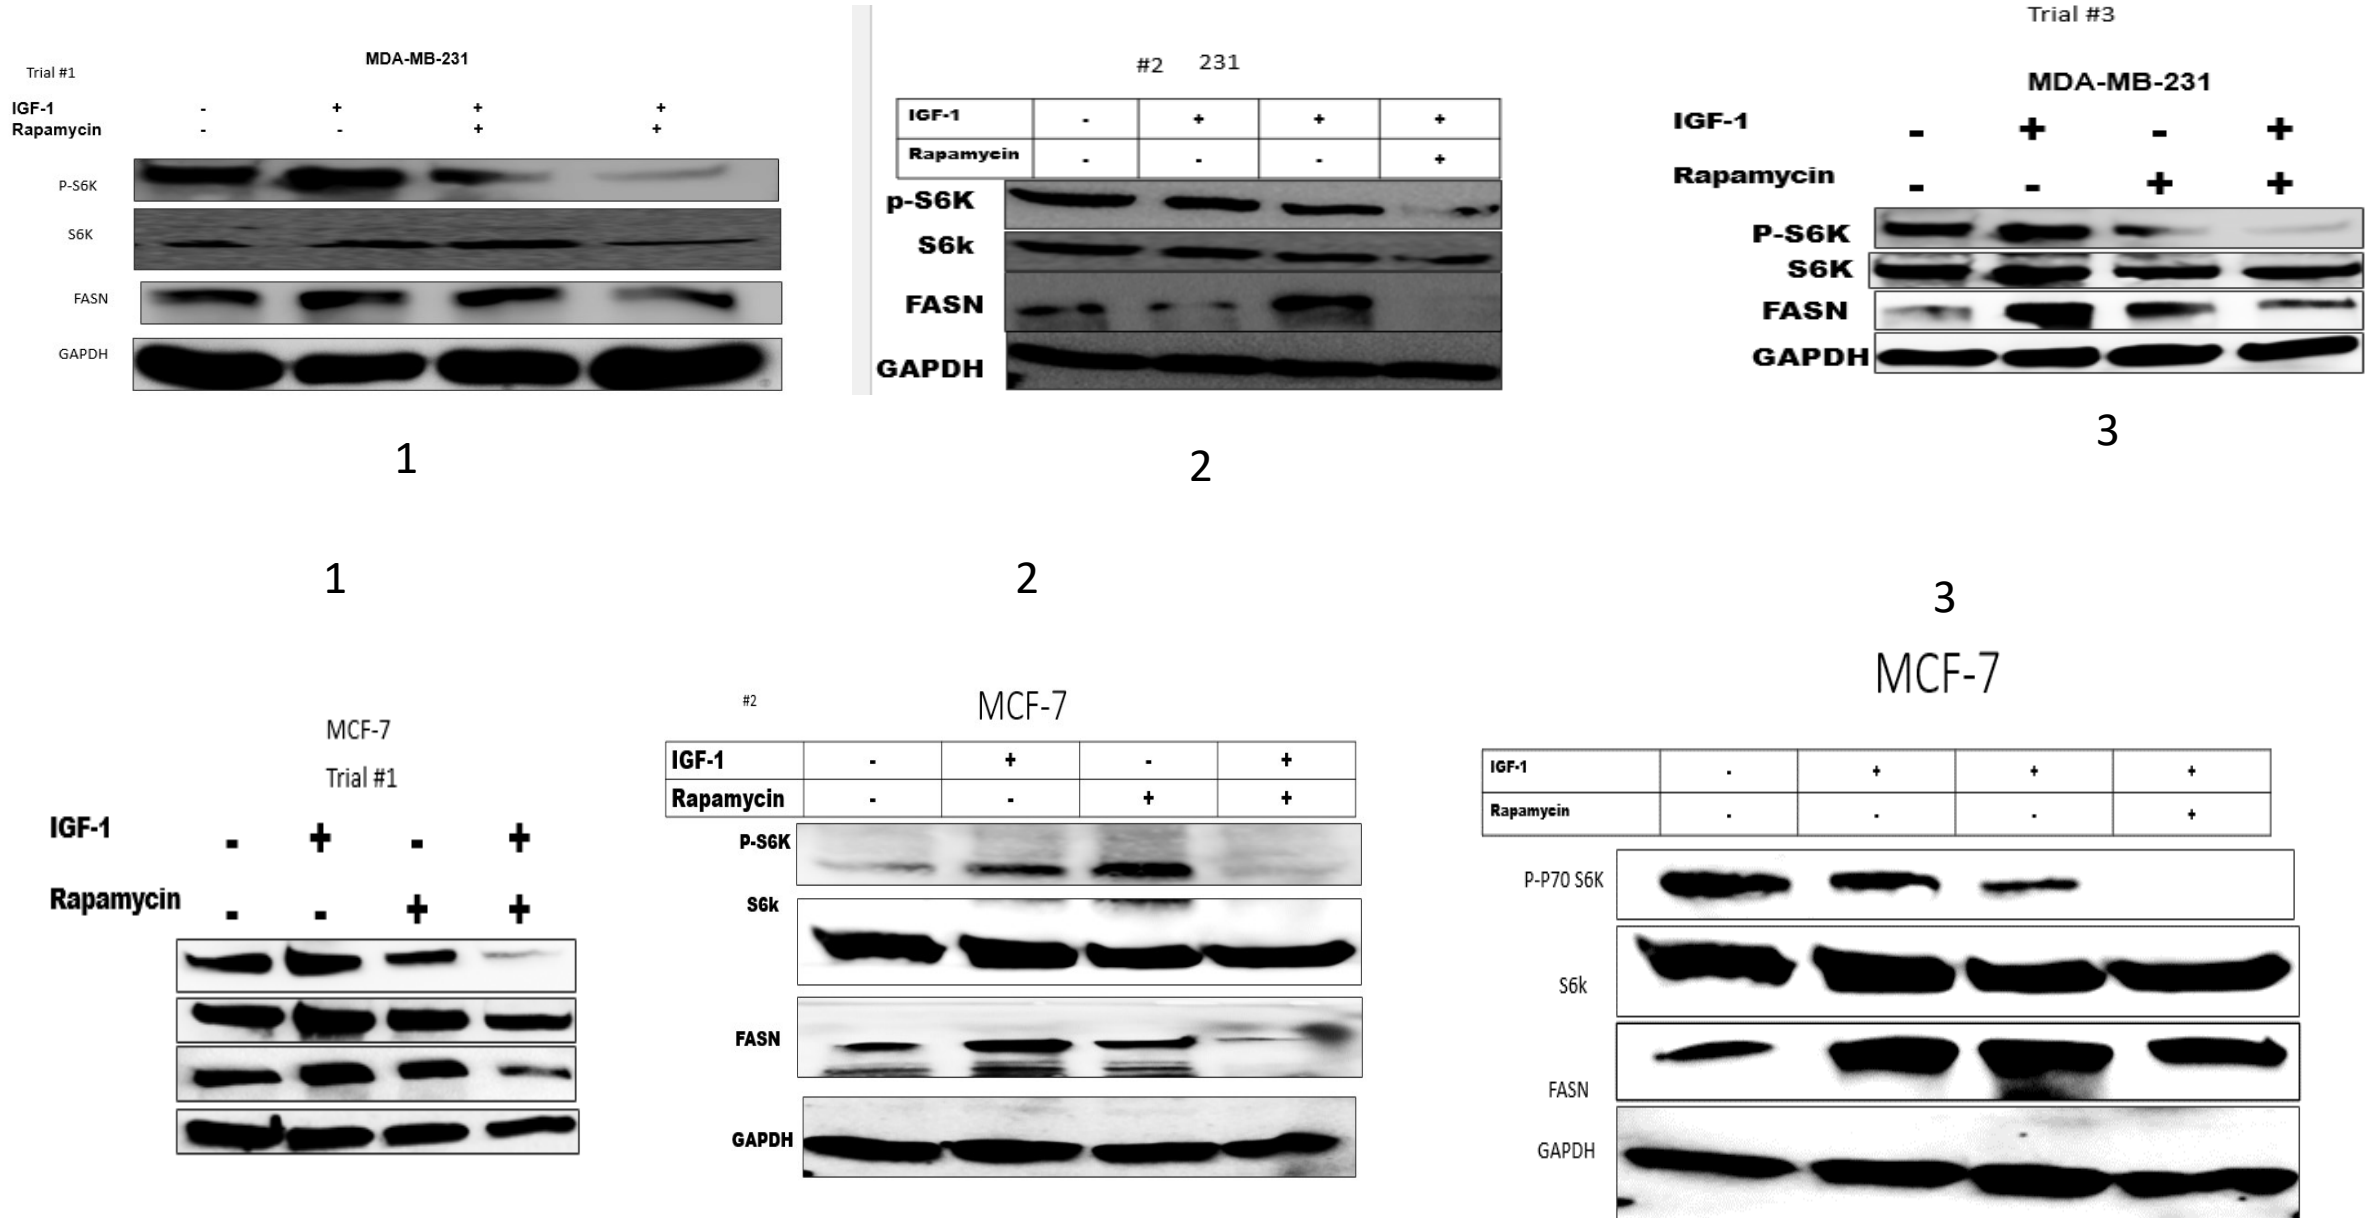

Figure 2(C)

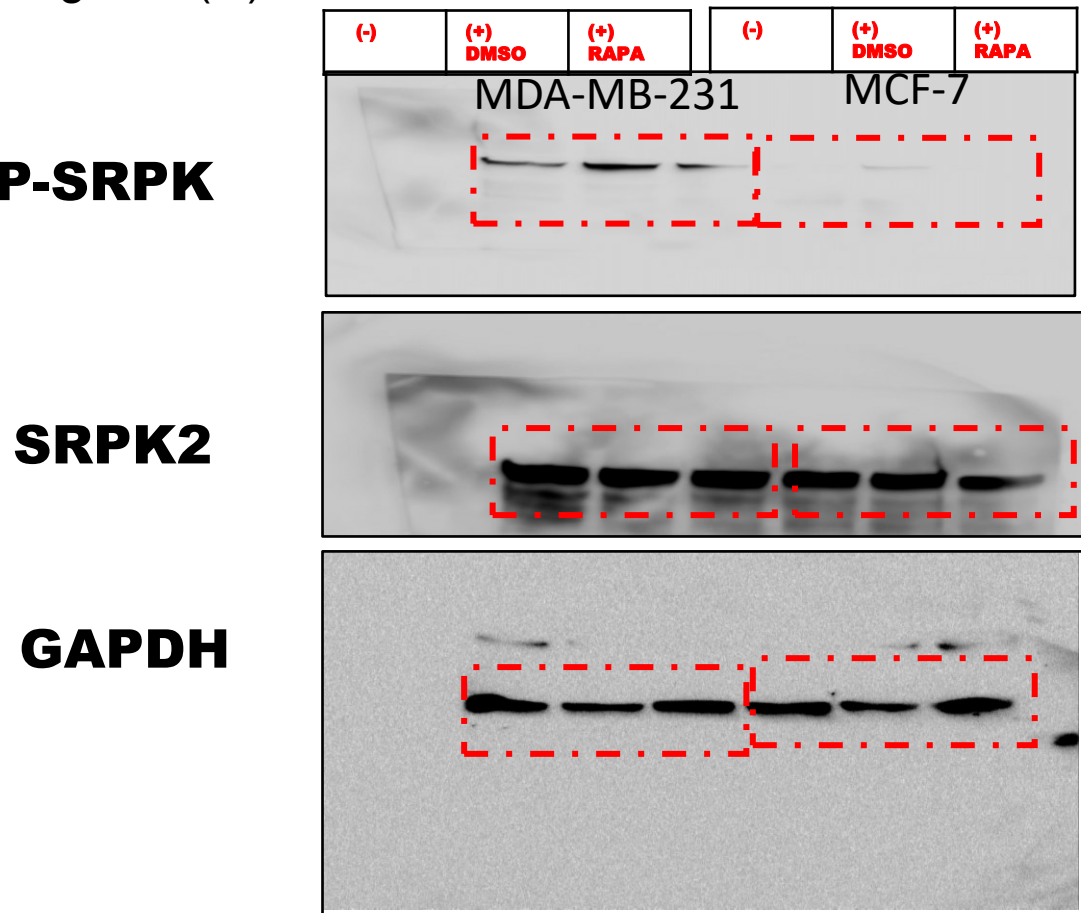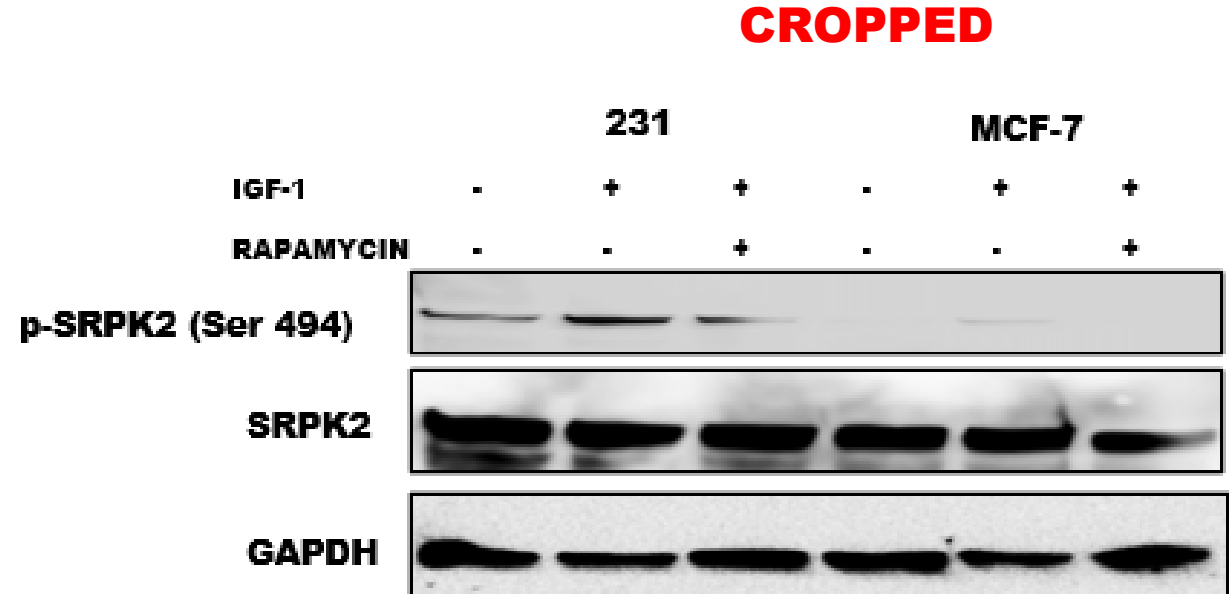



Figure 3 (B)

MDA-MB-231

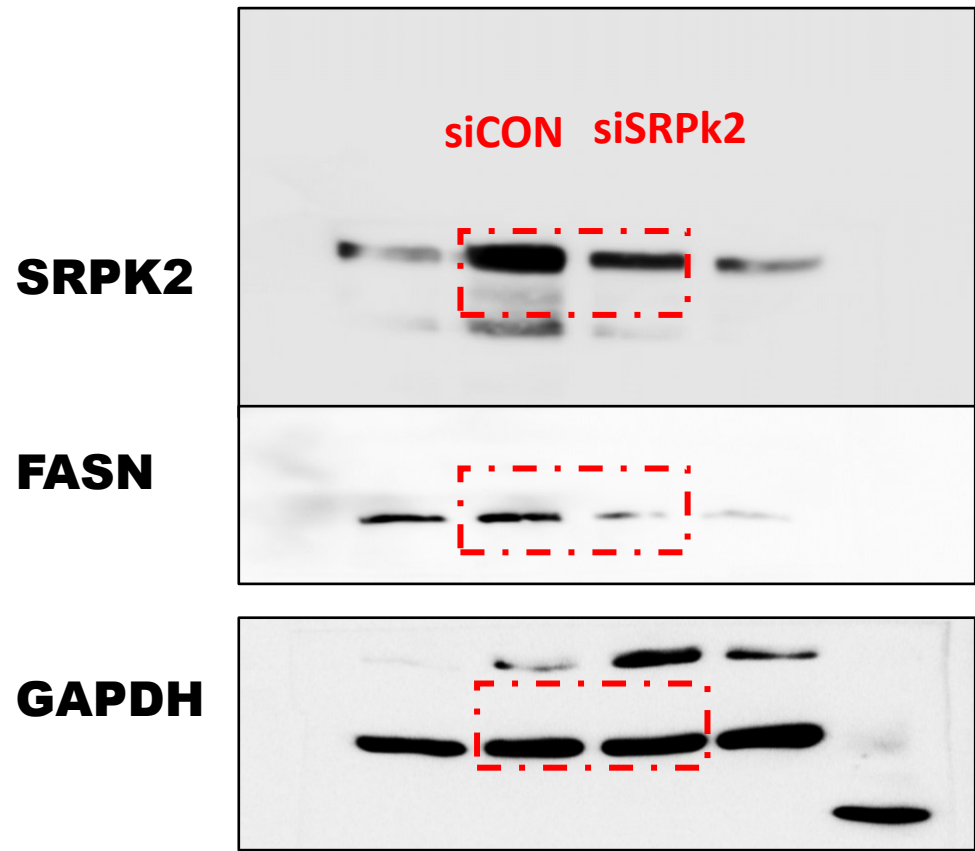

MCF-7

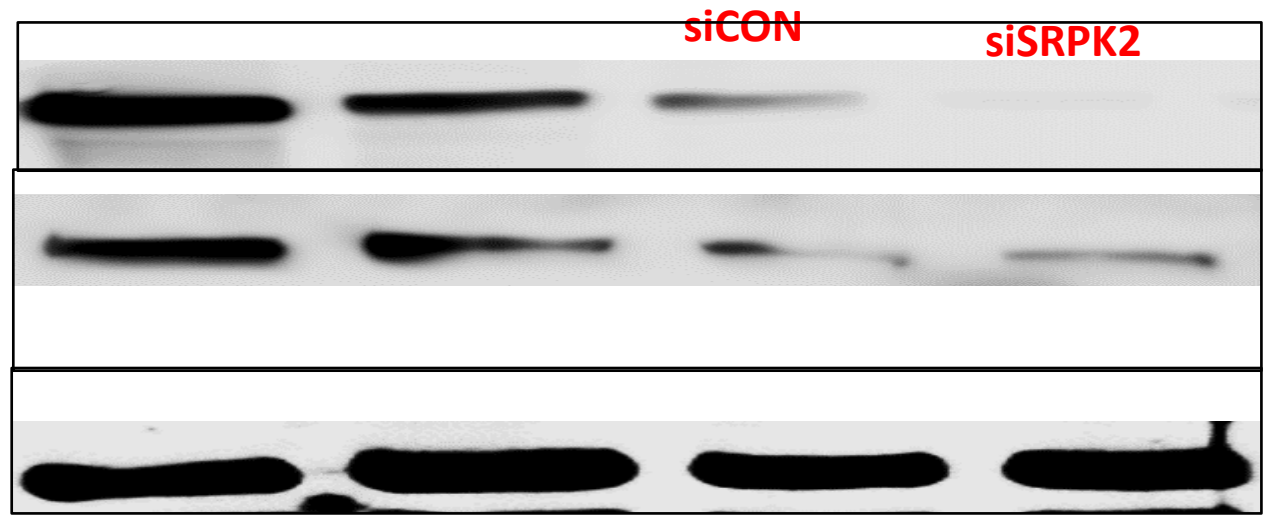

**CROPPED**

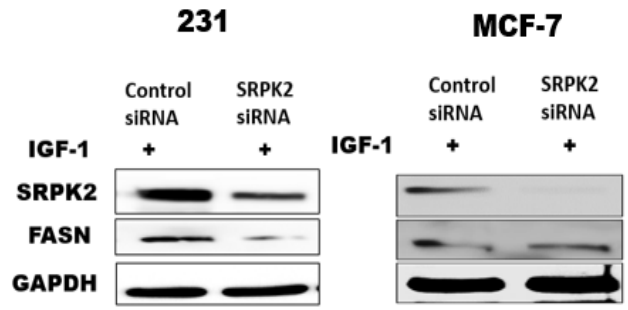

Figure 3 (B)

MDA-MB-231

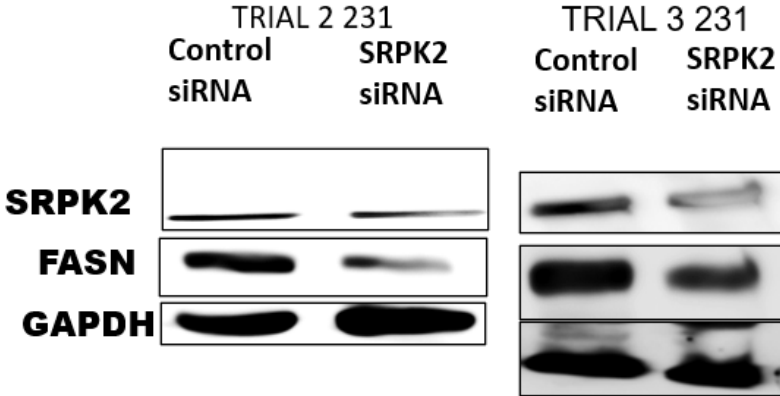

MCF-7 TRIAL 1

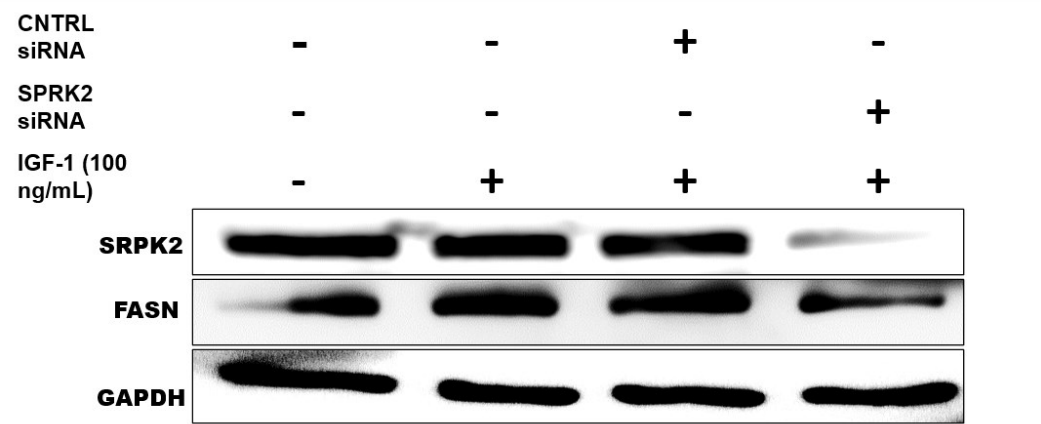

MCF-7 TRIAL 2 AND REPRESENTATIVE IMAGE (TRIAL 3)

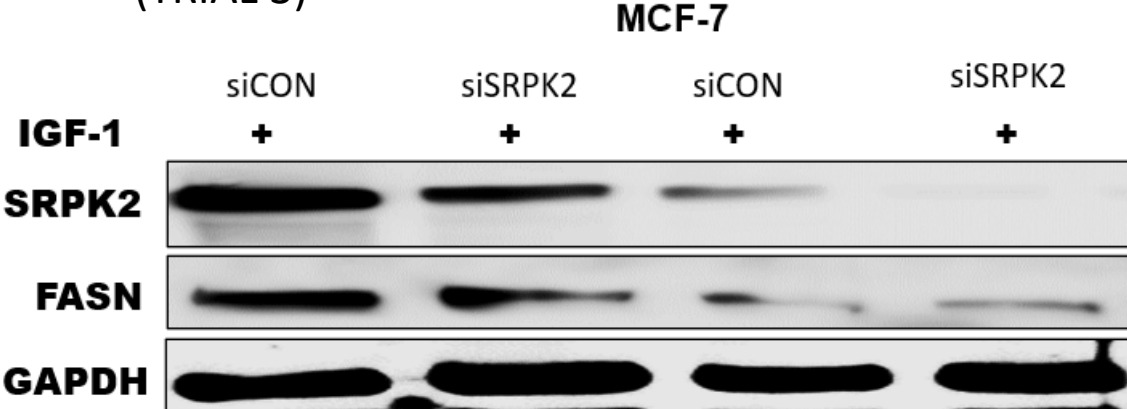

Figure 3 (C)

**CROPPED**

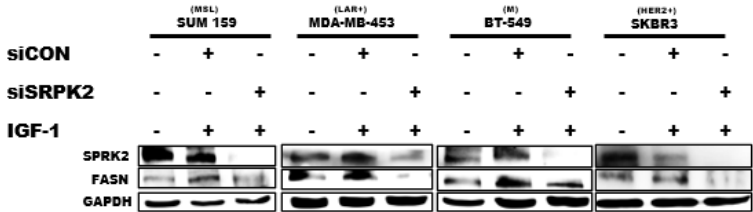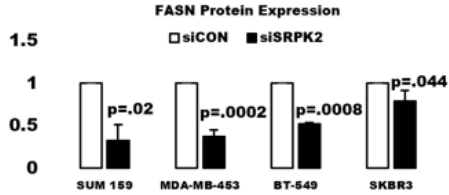

|         | (MSL)<br>SUM 159 |   |   | (LAR+)<br>MDA-MB-453 |   |   | (M)<br>BT-549 |   |   | (HER2+)<br>SKBR3 |   |   |
|---------|------------------|---|---|----------------------|---|---|---------------|---|---|------------------|---|---|
| siCON   | -                | + | - | -                    | + | - | -             | + | - | -                | + | - |
| siSRPK2 | -                | - | + | -                    | - | + | -             | - | + | -                | - | + |
| IGF-1   | -                | + | + | -                    | + | + | -             | + | + | -                | + | + |

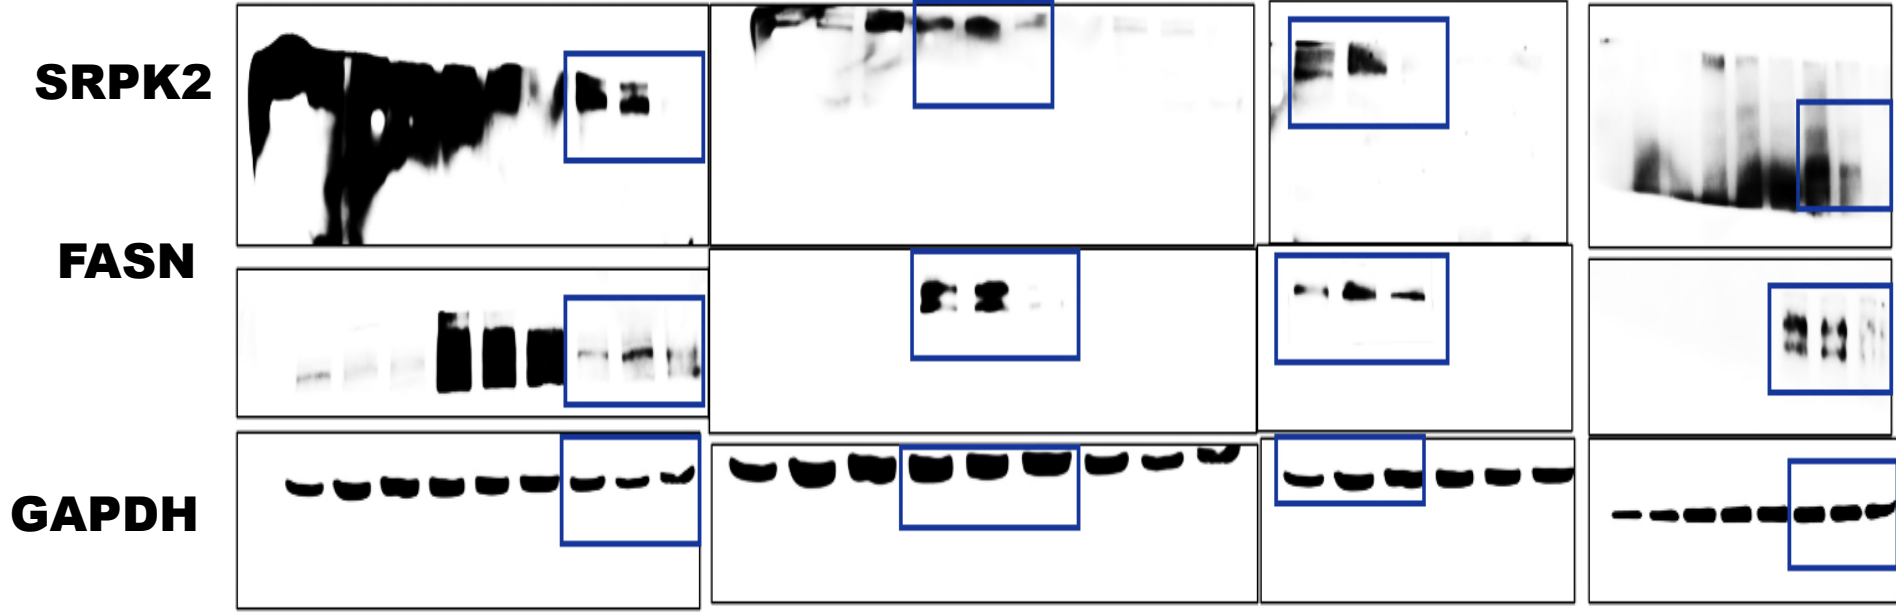

SUM 159 REPLICATE 2 & 3

REPLICATE 2

SUM 159

FASN

**siCON**  
**siSRPK2**  
**IGF-1**

| (MSL)<br>SUM 159 |   |   |
|------------------|---|---|
| -                | + | - |
| -                | - | + |
| -                | + | + |

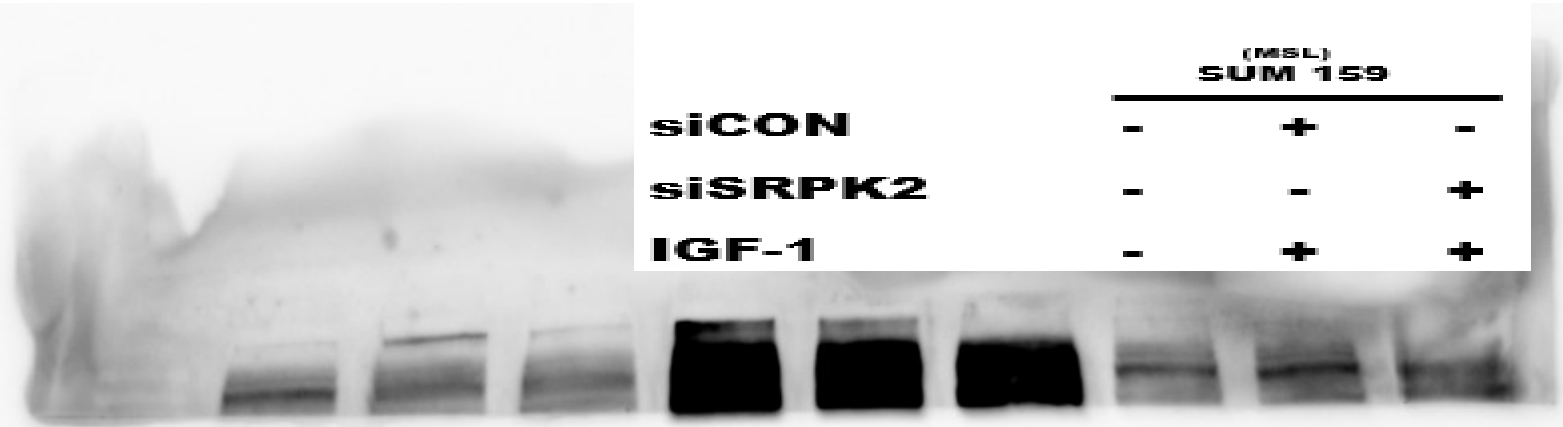

REPLICATE 3

FASN

**siCON**      -      +      -  
**siSRPK2**    -      -      +  
**IGF-1**        -      +      +

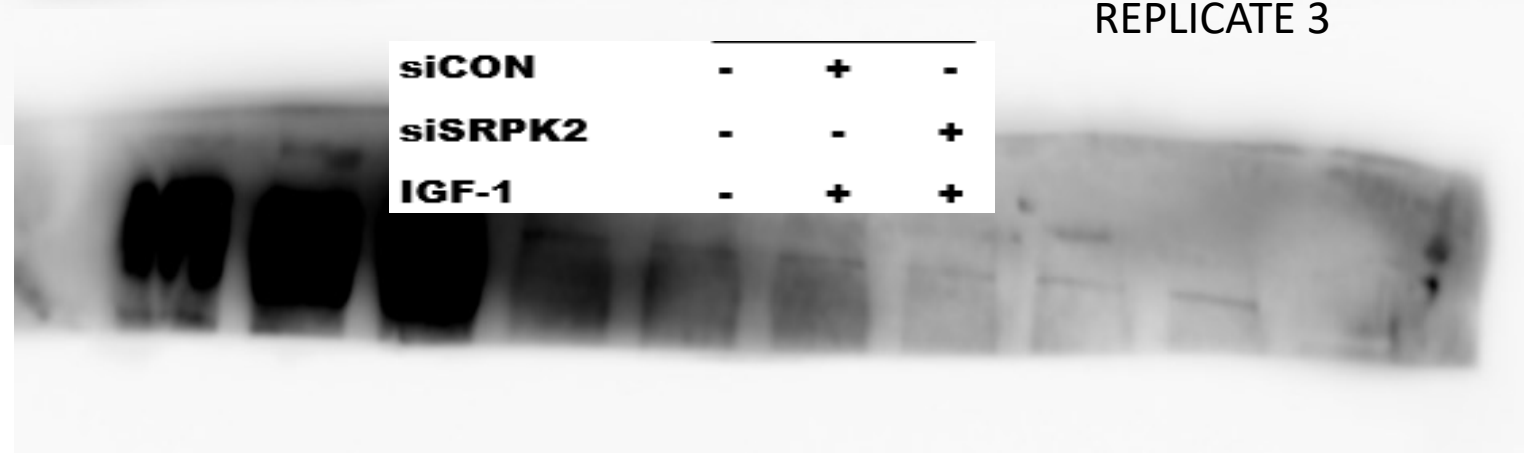



MDA-MB-453 REPLICATE 2 & 3

FASN

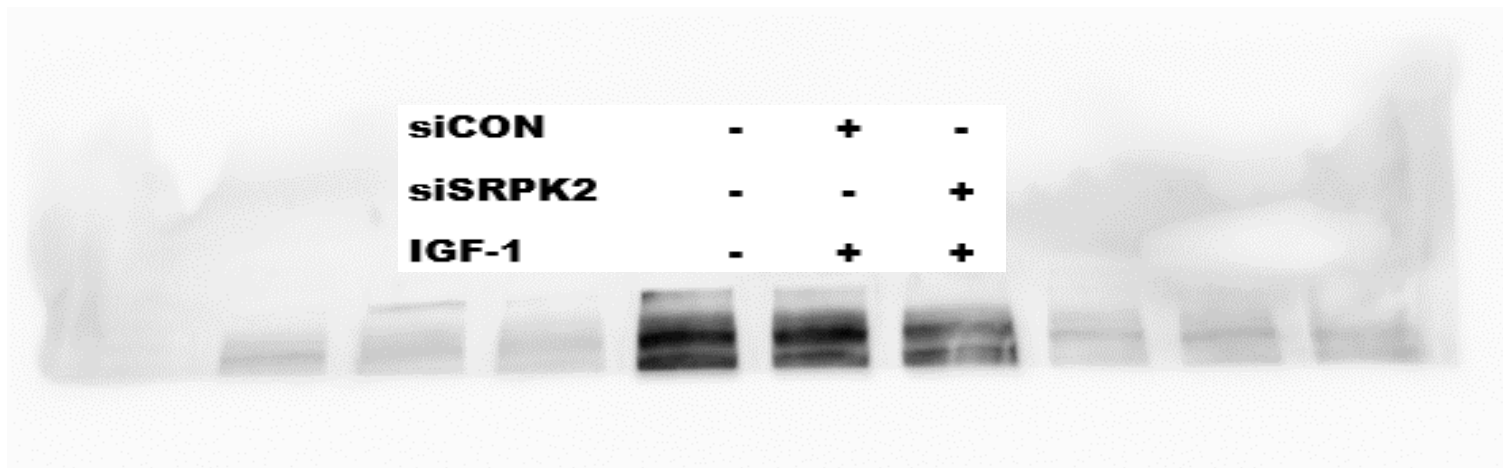

FASN

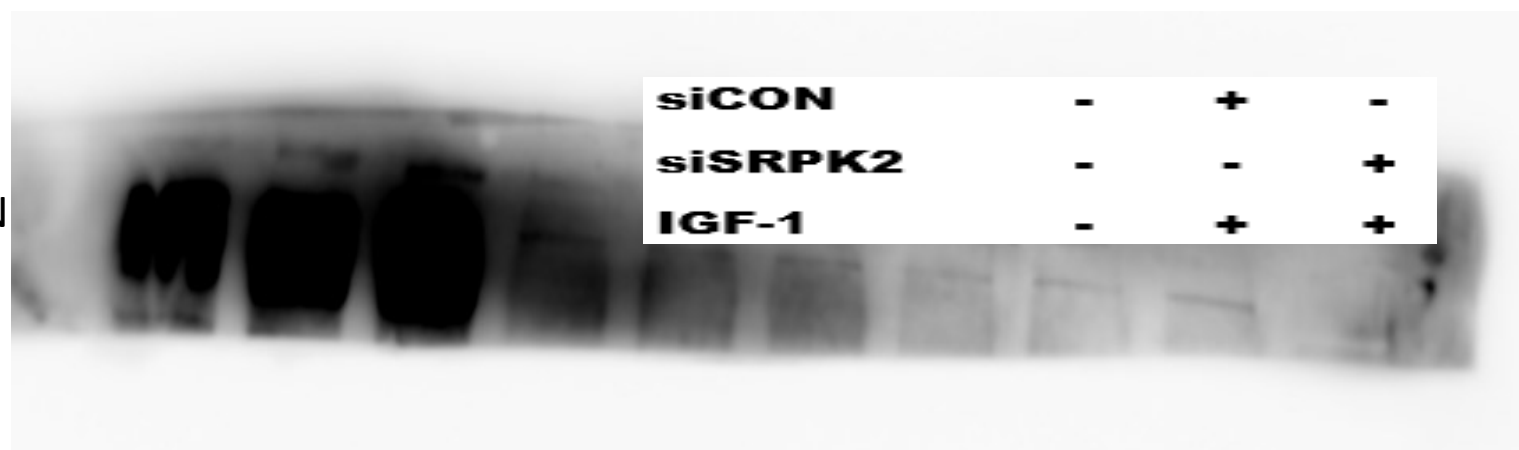

# BT-549 REPLICATES 2 & 3

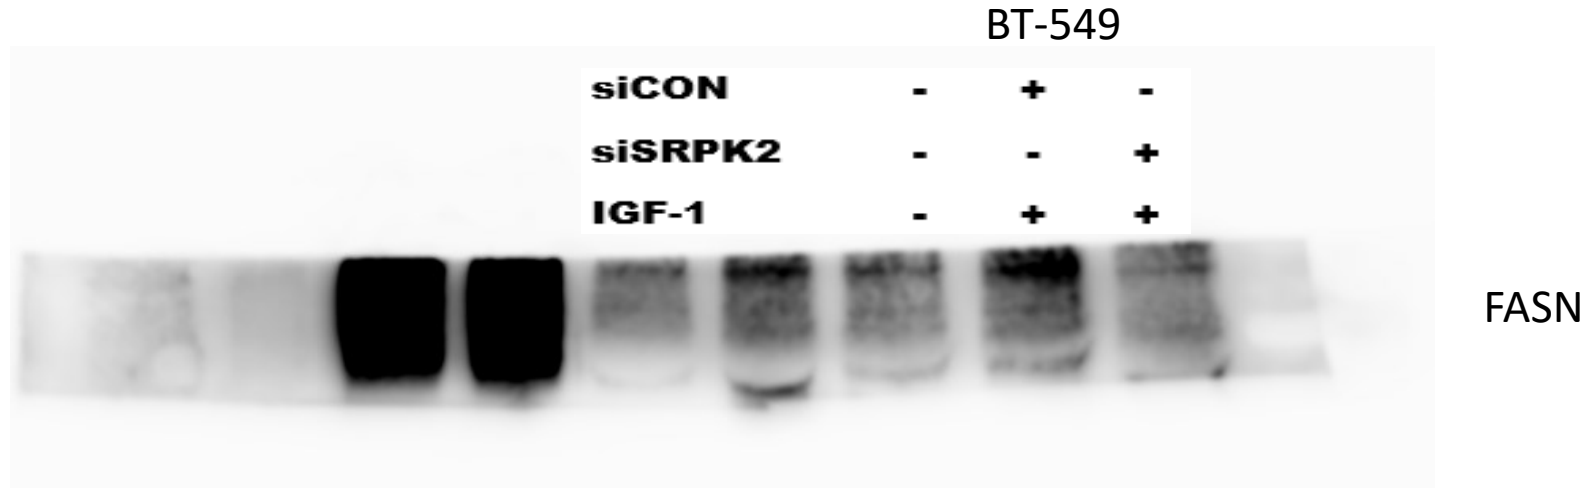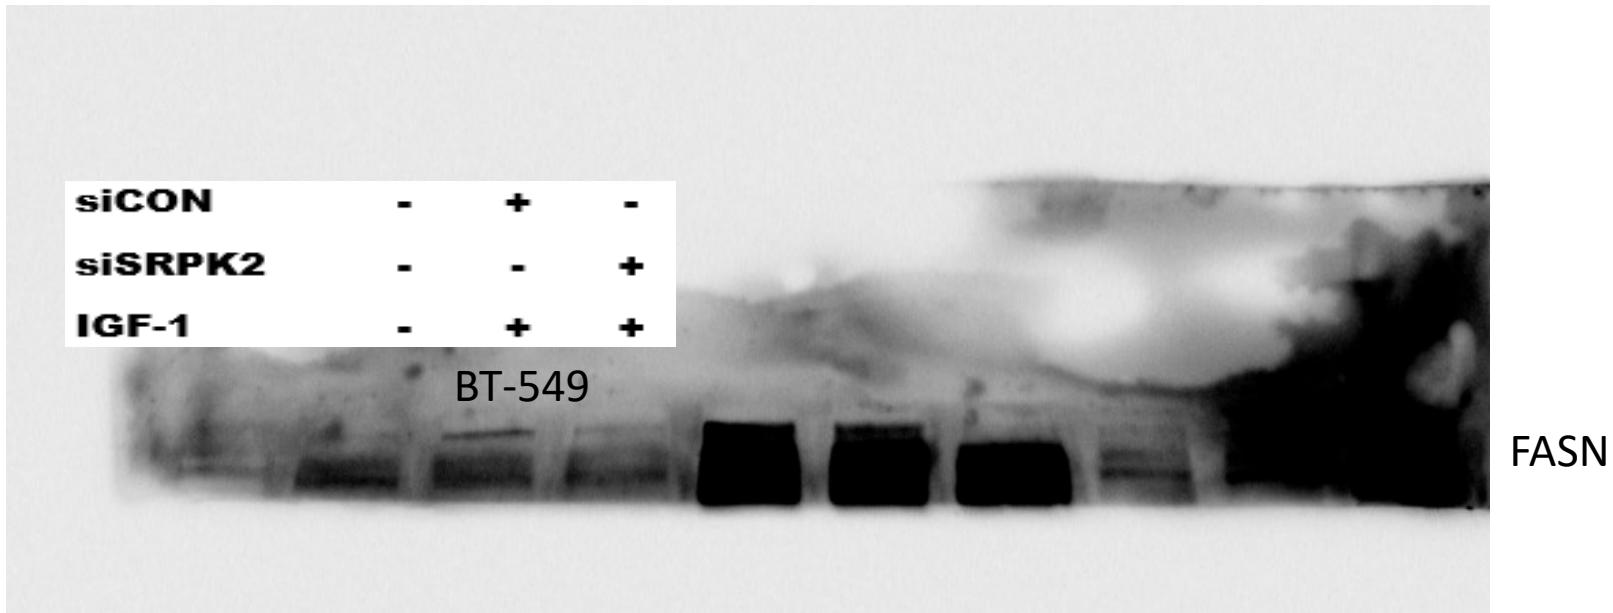

SKBR3 REPLICATES 2 & 3

FASN

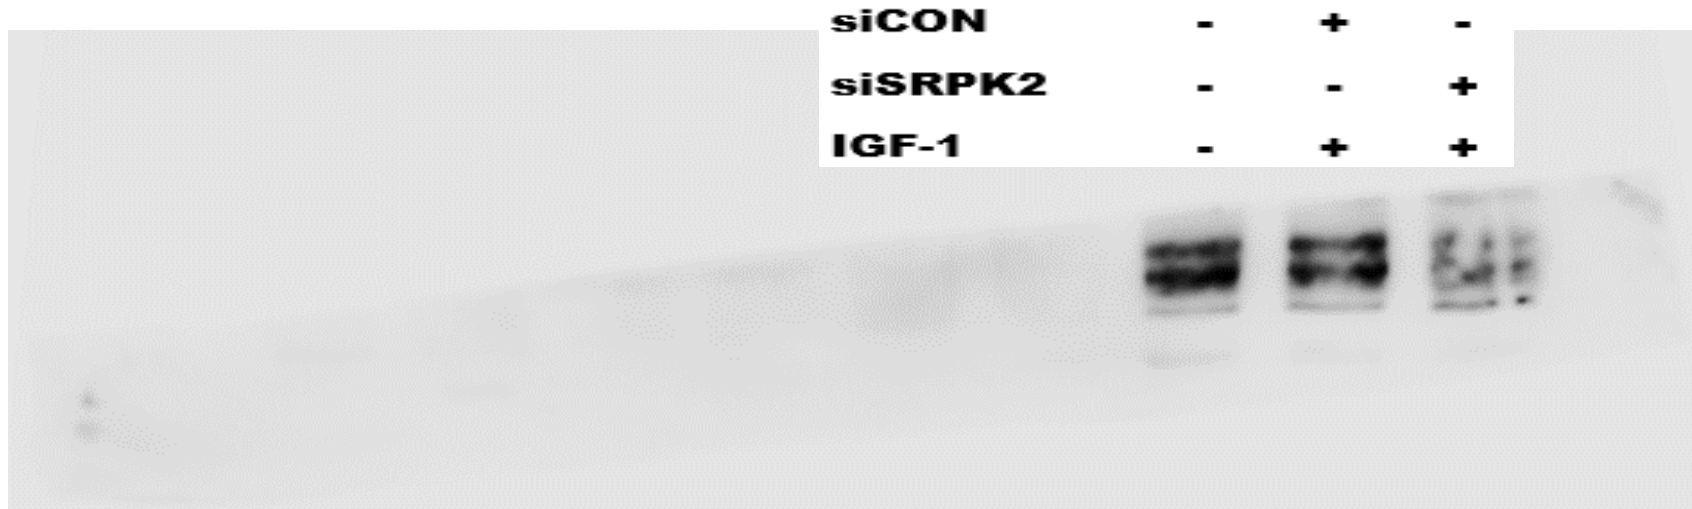

FASN

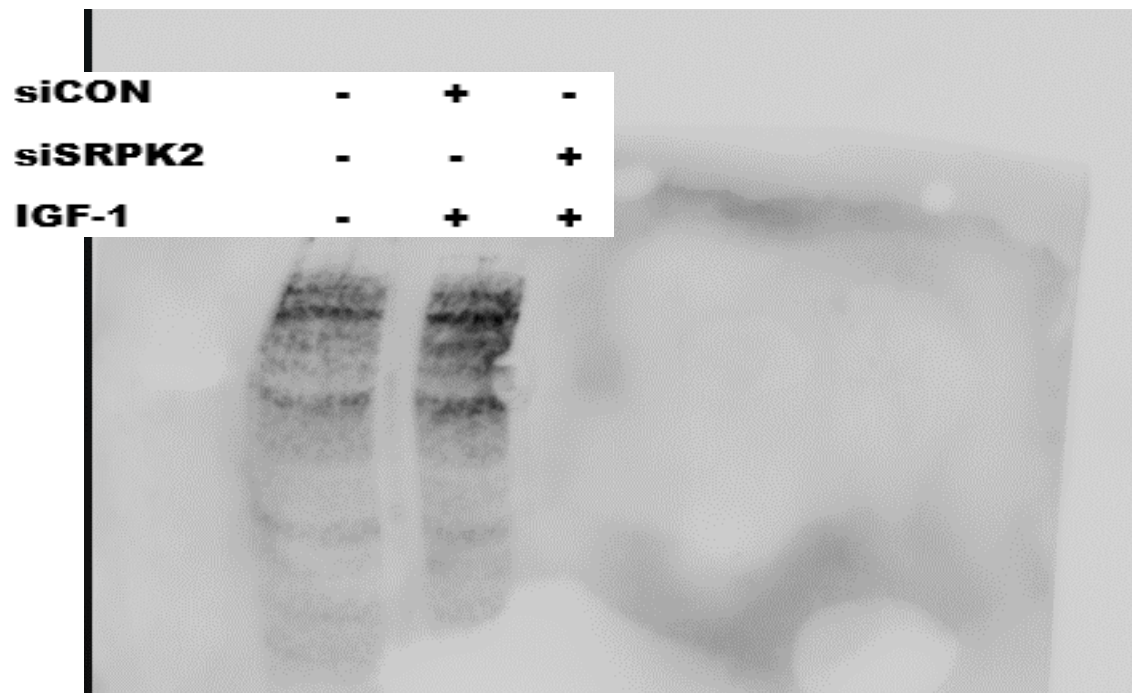

Supplement: 12885_2022_10062_MOESM2_ESM.pdf [file 12885_2022_10062_MOESM2_ESM.pdf]
