# Supplementary material for: An IGF-1R-mTORC1-SRPK2 signaling Axis contributes to FASN regulation in breast cancer
Source: BMC Cancer. 2022 Sep 12;22:976. doi: 10.1186/s12885-022-10062-z (PMC9469522; doi:10.1186/s12885-022-10062-z)
Supplement: Supplementary file 1 — Additional file 1. [file 12885_2022_10062_MOESM1_ESM.xlsx]

## Sheet: Antibodies 
Antibodies	Species	Application	Company	Product #
IGF-1R β XP	Rabbit	WB, IF	Cell Signaling Technology,	9750s
FASN	Rabbit	WB, IF	Cell Signaling Technology,	3180
SRPK2	Mouse	WB, IF	BD Biosciences	61118
p70 p-S6K	Mouse	WB	Santa Cruz Biotechnology	SC-8416
p70 S6K	Mouse	WB	Santa Cruz Biotechnology	SC-8418
p-Akt (SER 473) XP	Rabbit	WB	Cell Signaling Technology,	4060
Akt	Rabbit	WB	Cell Signaling Technology,	9272
p-SRPK2 (Ser494)	Rabbit	WB, IF	Millipore Sigma	07-1817
Anti-Rabbit HRP-linked IgG secondary	Rabbit	WB	Cell Signaling Technology,	#7074
Anti-Mouse HRP-linked IgG scondary	Mouse	WB	Cell Signaling Technology,	#7076
Cy3 Anti-Mouse IgG Conjugated Secondary	Mouse	IF	Jackson Laboratories	#715-165-150
FITC Anti-Rabbit IgG Conjugated secondary	Rabbit	IF	Jackson Laboratories	#711-095-152

## Sheet: Primers for qPCR mRNA 
PRIMER NAME	Sequence（5’→3’）
FASN FORWARD	CATCCAGATAGGCCTCATAGAC
FASN REVERSE	CTCCATGAAGTAGGAGTGGAAG
GAPDH FORWARD	GAGTCAACGGATTTGGTCGT
GAPDH REVERSE	GACAAGCCTCCCGTTCTCAG
PFK FORWARD	GCATGGGTATCTACGTGGGG
PFK REVERSE	CTCTGCGATGTTTGAGCCTC
SCD-1 FORWARD	TTCAGAAACACATGCTGATCCTCATAATTCCC
SCD-1 REVERSE	ATTAAGCACCACAGCATATCGCAAGAAAGT
ACTIN FORWARD	CATTGCCGACAGGATGCA
ACTIN REVERSE	GCTGATCCACATCTGCTGGAA
SRSF-1 FORWARD	CCGCAGGGAACAACGATTG
SRSF-1 REVERSE	GCCGTATTTGTAGAACACGTCCT

## Sheet: Primers for Intron Retention 
PRIMER NAME	Sequence（5’→3’）
FASN Intron 4 included FORWARD	ACAGCATGGTGGGCTGCCAG
FASN Intron 4 included REVERSE	TTTCTGCTCAGCATGTGGGG
FASN Intron 4 excluded FORWARD	CCAGATTCACTCCGAGGAAC
FASN Intron 4 excluded REVERSE	AGTCGAAGAAGAAGGAGAGC
